# Supplementary material
Source: Springer Nature journal article supplement (https://www.springermedizin.de/resource/supplementary/13256_2007_407_MOESM1_ESM.pdf/9645916)

(a)

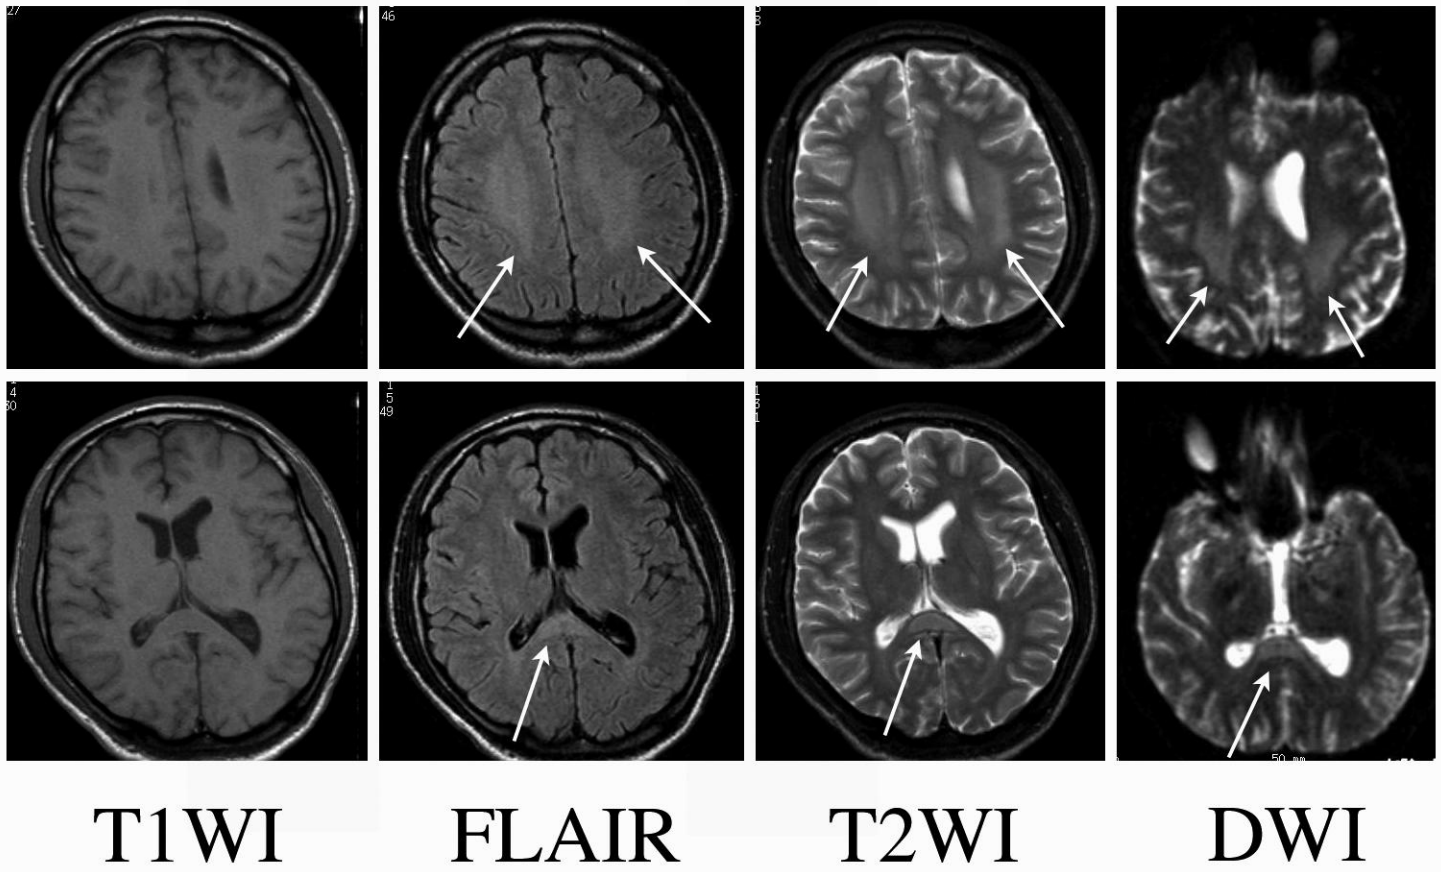

(b)

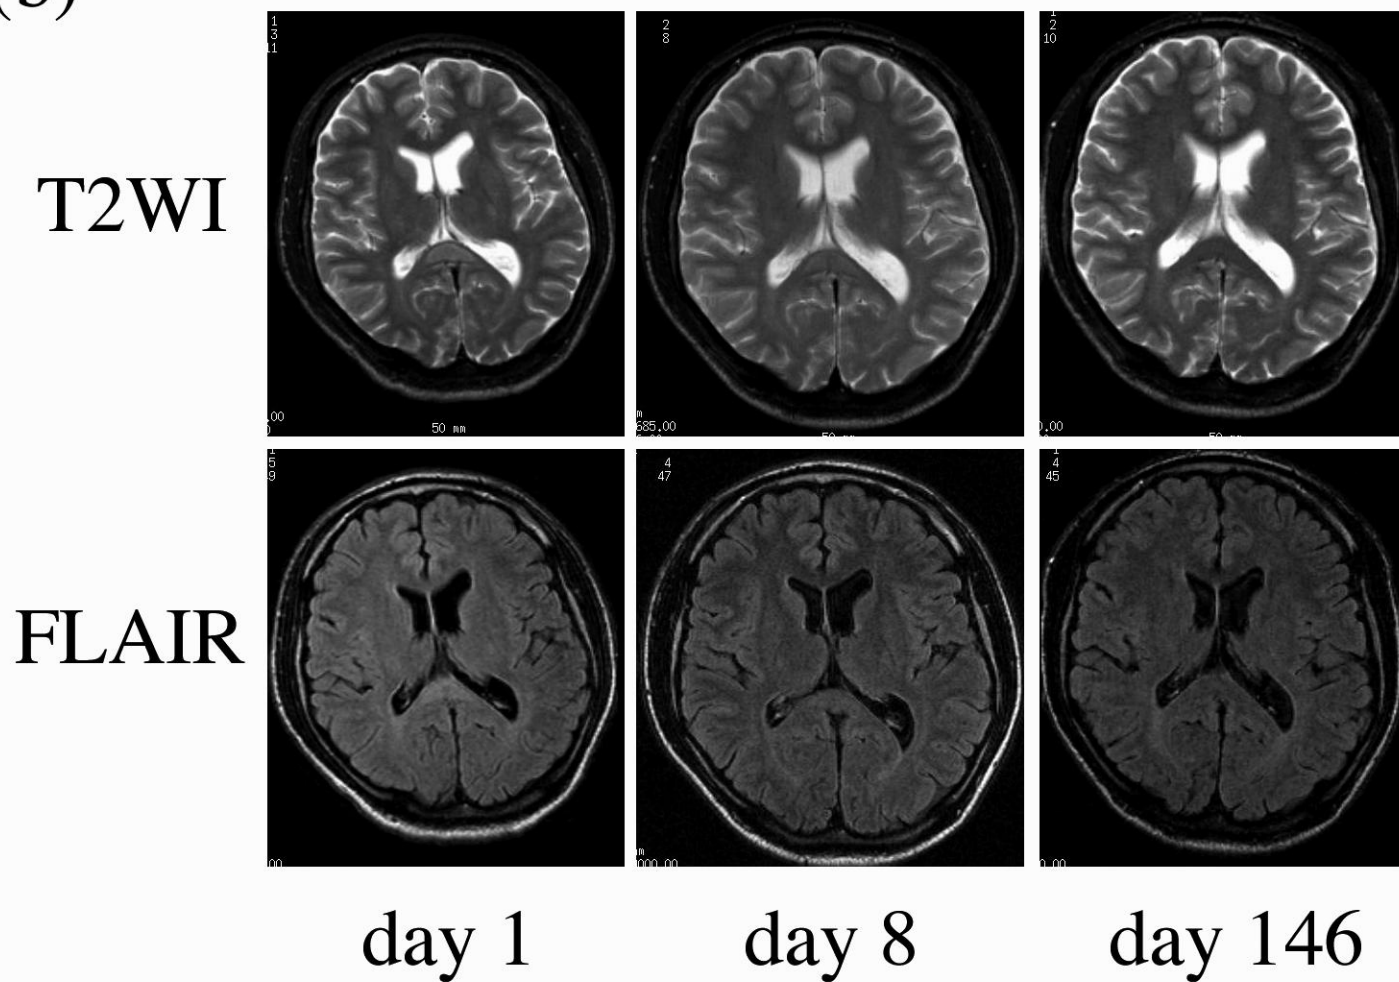

Supplement: MOESM1 [file 9645916]
